# Supplementary material for: COVID-19-Driven Improvements and Innovations in Pharmacy Education: A Scoping Review
Source: MDPI journal article supplement (doi:10.3390/pharmacy10030060), 2022-06-04
Supplement: s1 [file s1]

## **Supplementary Material: Executed search strategy, number of citations found for each search**

### **Search for Pubmed, n = 384 articles**

("covid-19"[Title/Abstract] OR "covid19"[Title/Abstract] OR "covid-19"[Title/Abstract] OR "sars-cov-2"[Title/Abstract] OR "sars-cov2"[Title/Abstract] OR "2019-ncov"[Title/Abstract] OR "2019ncov"[Title/Abstract] OR "coronavirus"[Title/Abstract]) AND (("education"[Title/Abstract] OR "student\*"[Title/Abstract] OR "trainee\*"[Title/Abstract] OR "intern\*"[Title/Abstract] OR "training\*"[Title/Abstract] OR "rotation\*"[Title/Abstract] OR "internship\*"[Title/Abstract] OR "educator\*"[Title/Abstract] OR "professor\*"[Title/Abstract] OR "preceptor\*"[Title/Abstract] OR "mentor\*"[Title/Abstract] OR "instructor\*"[Title/Abstract] OR "teacher\*"[Title/Abstract]) AND ("pharmacy"[Title/Abstract] AND (2019:2022[pdat]))

### **Search for Web of Science Core Collection, n = 538 articles**

((TS=(covid-19 or COVID19 or COVID-19 or SARS-CoV-2 or SARS-CoV2 or 2019-nCoV or 2019nCoV or coronavirus)) AND TS=(pharmacy or pharmacist)) AND TS=(school or college or education or student or trainee or intern or training or internship or preceptor or educator or mentor or instructor or teacher)

### **Search for Ovid Medline, n = 126 articles**

- 1 (covid-19 or COVID19 or COVID-19 or SARS-CoV-2 or SARS-CoV2 or 2019-nCoV or 2019nCoV or coronavirus).tw,kf.
- 2 exp coronavirus infections/
- 3 exp coronavirinae/
- 4 1 or 2 or 3
- 5 exp pharmacy education/
- 6 ((pharmacy or pharmacist\*) adj3 (school\* or education\* or student\* or trainee\* or rotation\* or training\* or professor\* or preceptor\* or educator\* or mentor\* or instructor\* or teacher\*)).tw,kf.
- 7 5 or 6
- 8 4 and 7
- 9 limit 8 to yr="2019 -Current"

### **Search for MedEdPortal, n = 9 articles**

(covid-19 OR coronavirus) AND pharmacy education
